# Supplementary material for: Individual recognition of opposite sex vocalizations in the zebra finch
Source: PubMed Central journal article supplement (PMC5514125; doi:10.1038/s41598-017-05982-x), 2017-07-17
Supplement: 41598_2017_5982_MOESM1_ESM.pdf [file 41598_2017_5982_MOESM1_ESM.pdf]

## Supplementary Materials for

### Individual recognition of opposite sex vocalizations in the zebra finch

Pietro B. D'Amelio\*, Milena Klumb, Mauricio N. Adreani, Manfred L. Gahr, and Andries ter Maat

\*Correspondence to: [pdamelio@orn.mpg.de](mailto:pdamelio@orn.mpg.de); [pie.damelio@gmail.com](mailto:pie.damelio@gmail.com)

This file includes:

Supplementary Figures S1 to S9 and Table S1 to S9

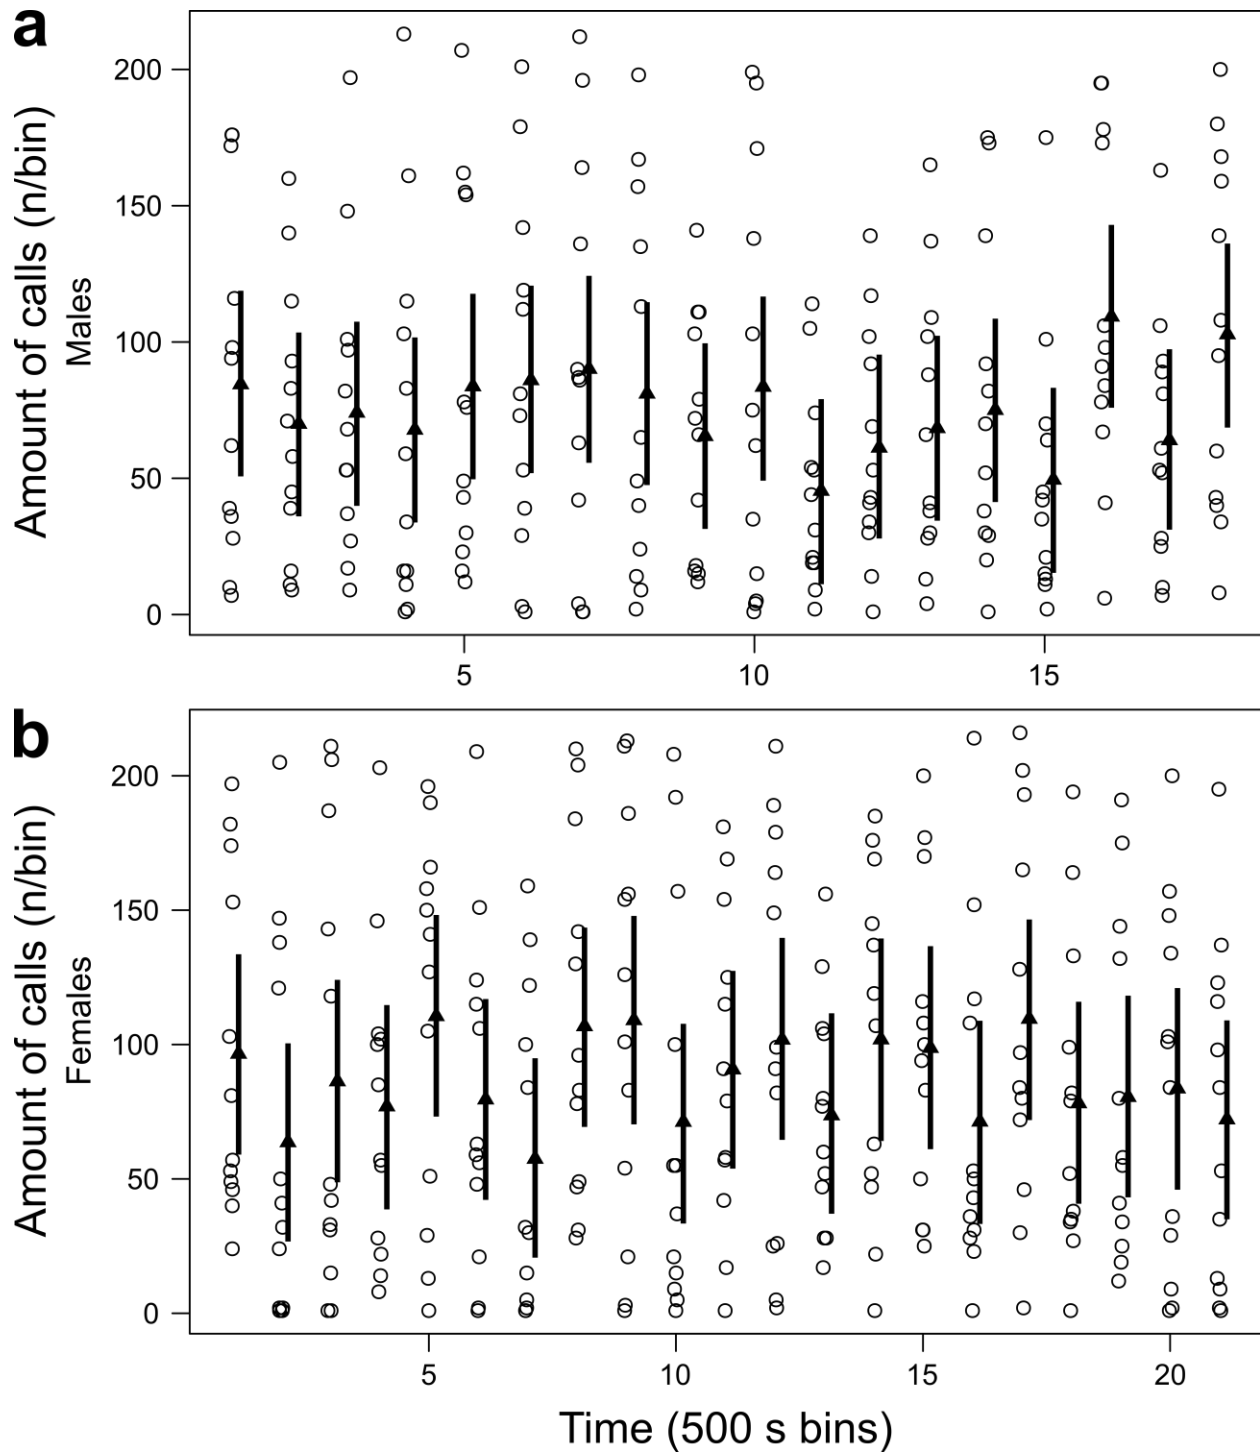

### Supplementary fig.1

Acclimatization of the number of call. Number of calls focal individuals emitted during the entire playback experiment, divided in 500 s bins. Shown are the raw data of both trials for all 12 individuals, divided in males (top, a) and females (bottom, b). Dots represent the sum of responses each individual emitted per 500 s bin by trials; error bars indicate estimated credible intervals and fitted values from the linear mixed model. We notice that in contrast to what we would expect in case of becoming accustomed to the playback stimuli; there is not a steady decline of the number of calls during the playback. There is no statistical difference between the first and the last bin.

| Call type | Familiarity | Latency     |             | P. mate slower |               |
|-----------|-------------|-------------|-------------|----------------|---------------|
|           |             | A           | B           | A              | B             |
| Tet       | Mate        | 0.89 ± 0.45 | 0.63 ± 0.40 |                |               |
|           | Familiar    | 0.80 ± 0.44 | 0.66 ± 0.42 | 0.9419         | 0.755         |
|           | Unfamiliar  | 0.66 ± 0.42 | 0.68 ± 0.42 | 0.743          | 0.8757        |
| Stack     | Mate        | 0.55 ± 0.38 | 0.52 ± 0.37 |                |               |
|           | Familiar    | 0.55 ± 0.39 | 0.65 ± 0.42 | 0.4206         | <b>0.0018</b> |
|           | Unfamiliar  | 0.60 ± 0.41 | 0.64 ± 0.41 | 0.1343         | <b>0.0018</b> |
| Distance  | Mate        | 0.39 ± 0.30 | 0.43 ± 0.32 |                |               |
|           | Familiar    | 0.44 ± 0.34 | 0.45 ± 0.33 | 0.1836         | 0.3585        |
|           | Unfamiliar  | 0.48 ± 0.38 | 0.53 ± 0.38 | 0.0549         | 0.0957        |
| Kackle    | Mate        | 0.76 ± 0.41 | 0.64 ± 0.41 |                |               |
|           | Familiar    | 0.83 ± 0.38 | 0.72 ± 0.41 | 0.7985         | 0.1429        |
|           | Unfamiliar  | 0.76 ± 0.41 | 0.64 ± 0.42 | 0.6141         | 0.571         |
| Hat       | Mate        | 0.63 ± 0.42 | 0.72 ± 0.43 |                |               |
|           | Familiar    | 0.71 ± 0.42 | 0.64 ± 0.40 | 0.1844         | 0.5638        |
|           | Unfamiliar  | 0.69 ± 0.48 | 0.62 ± 0.42 | 0.2669         | 0.889         |

### Supplementary table 1

Latency of males' calls to females' playback. The mean ± the standard deviation of each playback series is reported together with the probabilities (P) that calls emitted during mate series have a longer latency than calls emitted during the other familiarity categories. The statistical significant differences are reported in bold.

| Call type | Familiarity | Latency     |             | P mate slower |               |
|-----------|-------------|-------------|-------------|---------------|---------------|
|           |             | A           | B           | A             | B             |
| Tet       | Mate        | 0.76 ± 0.41 | 0.67 ± 0.40 |               |               |
|           | Familiar    | 0.75 ± 0.41 | 0.77 ± 0.39 | 0.116         | <b>0.0048</b> |
|           | Unfamiliar  | 0.65 ± 0.39 | 0.75 ± 0.41 | 0.9474        | <b>0.0196</b> |
| Stack     | Mate        | 0.59 ± 0.40 | 0.65 ± 0.37 |               |               |
|           | Familiar    | 0.70 ± 0.39 | 0.69 ± 0.39 | <b>0.0004</b> | <b>0.0142</b> |
|           | Unfamiliar  | 0.72 ± 0.39 | 0.67 ± 0.38 | <b>0.0005</b> | <b>0.0036</b> |
| Distance  | Mate        | 0.51 ± 0.35 | 0.58 ± 0.38 |               |               |
|           | Familiar    | 0.64 ± 0.37 | 0.68 ± 0.37 | <b>0.0004</b> | <b>0.0001</b> |
|           | Unfamiliar  | 0.69 ± 0.35 | 0.64 ± 0.36 | <b>0.016</b>  | 0.16          |
| Kackle    | Mate        | 0.75 ± 0.41 | 0.67 ± 0.40 |               |               |
|           | Familiar    | 0.75 ± 0.39 | 0.70 ± 0.38 | 0.3322        | <b>0.0256</b> |
|           | Unfamiliar  | 0.74 ± 0.40 | 0.74 ± 0.40 | 0.5333        | <b>0.0235</b> |
| Hat       | Mate        | 0.62 ± 0.39 | 0.63 ± 0.39 |               |               |
|           | Familiar    | 0.76 ± 0.40 | 0.65 ± 0.38 | <b>0.0032</b> | 0.3497        |
|           | Unfamiliar  | 0.71 ± 0.41 | 0.76 ± 0.41 | <b>0.0187</b> | <b>0.0001</b> |
| Song      | Mate        | 0.66 ± 0.41 | 0.68 ± 0.42 |               |               |
|           | Familiar    | 0.79 ± 0.41 | 0.70 ± 0.42 | <b>0.0001</b> | 0.3855        |
|           | Unfamiliar  | 0.78 ± 0.38 | 0.71 ± 0.40 | <b>0.0004</b> | 0.2033        |

### Supplementary table 2

Latency of females' calls to males' playback. The mean ± the standard deviation of each playback series is reported together with the probabilities (P) that calls emitted during mate series have a longer latency than calls emitted during the other familiarity categories. The statistical significant differences are reported in bold.

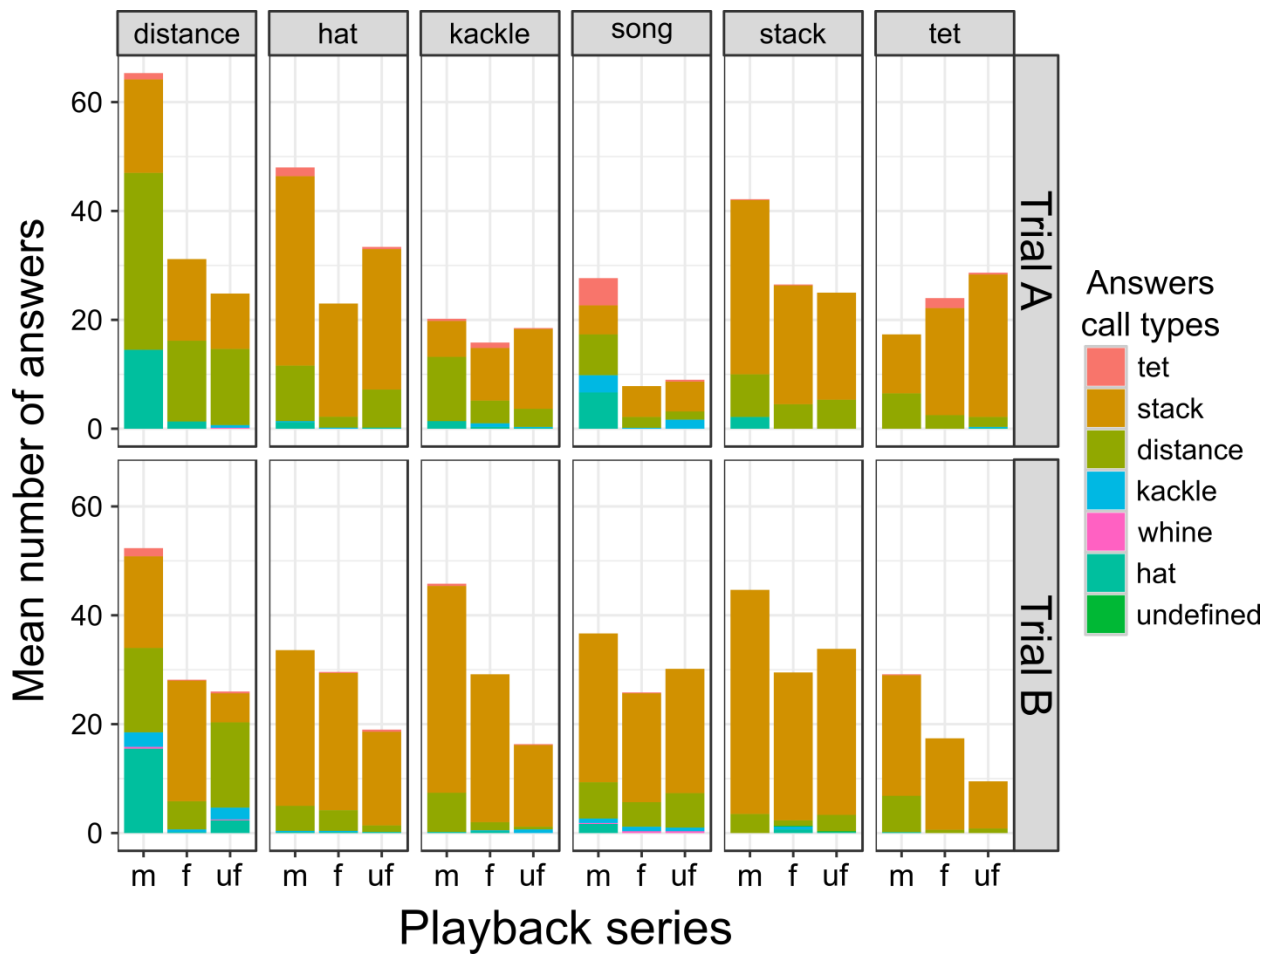

### Supplementary fig. 2

Call types that females used to answer male playback. Shown are the mean number of answers for each playback series in trials A and B. Colours represent the type of answering call (used). Familiarity categories: **m**= mate of the focal bird; **f**= familiar individual; **uf**= unfamiliar individual.

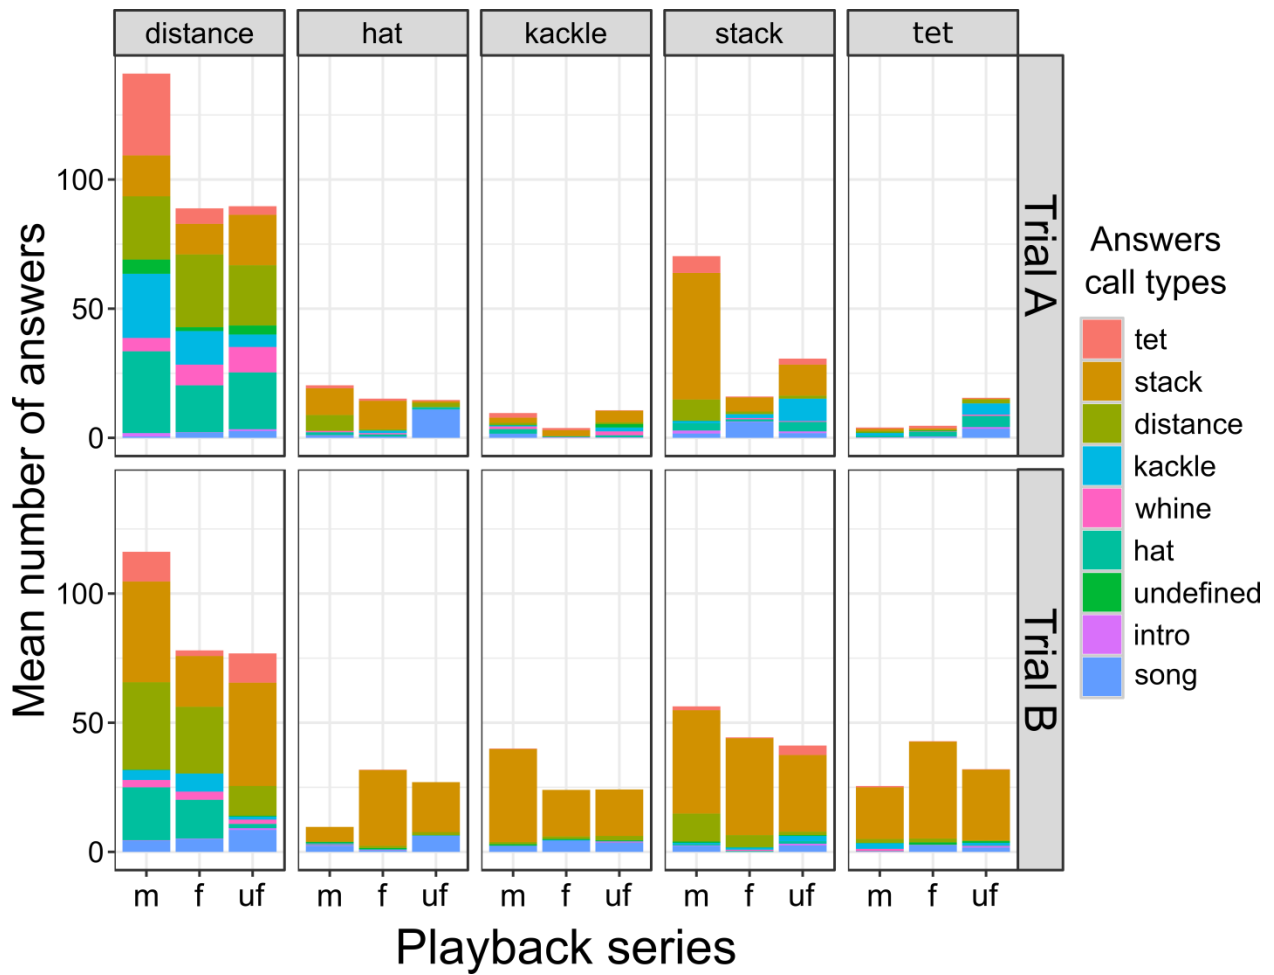

**Supplementary fig. 3**

Call types that males use to answer female playback. Shown are the mean number of answers for each playback series in trials A and B. Colours represent the type of answering vocalization (used) ("intro" = song introductory syllable). Familiarity categories: **m**= mate of the focal bird; **f**= familiar individual; **uf**= unfamiliar individual.

| Trial | Playback type | Answer type | Proportion of the specific call type used as answer (mean $\pm$ SD) |                 |                 | Test (N; K-W chi-squared; P-value) |
|-------|---------------|-------------|---------------------------------------------------------------------|-----------------|-----------------|------------------------------------|
|       |               |             | Mate                                                                | Familiar        | Unfamiliar      |                                    |
| A     | Distance      | Stack       | 0.31 $\pm$ 0.30                                                     | 0.38 $\pm$ 0.30 | 0.42 $\pm$ 0.13 | 13; 0.7; 0.699                     |
|       |               | Distance    | 0.54 $\pm$ 0.19                                                     | 0.52 $\pm$ 0.32 | 0.56 $\pm$ 0.13 | 13; 0.03; 0.987                    |
| B     | Distance      | Stack       | 0.47 $\pm$ 0.28                                                     | 0.75 $\pm$ 0.14 | 0.47 $\pm$ 0.38 | 13; 1.7; 0.418                     |
|       |               | Distance    | 0.30 $\pm$ 0.22                                                     | 0.16 $\pm$ 0.04 | 0.34 $\pm$ 0.37 | 13; 0.3; 0.875                     |
| A     | Hat           | Stack       | 0.67 $\pm$ 0.22                                                     | 0.90 $\pm$ 0.08 | 0.69 $\pm$ 0.24 | 13; 5.4; 0.067                     |
|       |               | Distance    | 0.28 $\pm$ 0.18                                                     | 0.07 $\pm$ 0.09 | 0.25 $\pm$ 0.13 | 13; 5.4; 0.068                     |
| B     | Hat           | Stack       | 0.89 $\pm$ 0.09                                                     | 0.89 $\pm$ 0.10 | 0.93 $\pm$ 0.06 | 9; 1.1; 0.576                      |
| A     | Kackle        | Stack       | 0.39 $\pm$ 0.37                                                     | 0.52 $\pm$ 0.36 | 0.80 $\pm$ 0.18 | 15; 3.2; 0.200                     |
|       |               | Distance    | 0.51 $\pm$ 0.38                                                     | 0.26 $\pm$ 0.23 | 0.19 $\pm$ 0.18 | 15; 2; 0.365                       |
| B     | Kackle        | Stack       | 0.87 $\pm$ 0.10                                                     | 0.94 $\pm$ 0.04 | 0.84 $\pm$ 0.23 | 15; 0.9; 0.630                     |
|       |               | Distance    | 0.12 $\pm$ 0.10                                                     | 0.05 $\pm$ 0.04 | 0.06 $\pm$ 0.07 | 15; 1.8; 0.397                     |
| A     | Song          | Distance    | 0.34 $\pm$ 0.32                                                     | 0.37 $\pm$ 0.18 | 0.16 $\pm$ 0.11 | 8; 1.4; 0.488                      |
| B     | Song          | Stack       | 0.62 $\pm$ 0.21                                                     | 0.87 $\pm$ 0.13 | 0.84 $\pm$ 0.16 | 10; 3; 0.223                       |
| A     | Stack         | Stack       | 0.86 $\pm$ 0.16                                                     | 0.82 $\pm$ 0.12 | 0.77 $\pm$ 0.23 | 12; 0.7; 0.692                     |
|       |               | Distance    | 0.11 $\pm$ 0.14                                                     | 0.18 $\pm$ 0.12 | 0.23 $\pm$ 0.23 | 12; 1.4; 0.488                     |
| B     | Stack         | Stack       | 0.93 $\pm$ 0.08                                                     | 0.92 $\pm$ 0.03 | 0.95 $\pm$ 0.07 | 15; 0.8; 0.673                     |
|       |               | Distance    | 0.07 $\pm$ 0.08                                                     | 0.04 $\pm$ 0.03 | 0.05 $\pm$ 0.07 | 15; 0.7; 0.692                     |
| A     | Tet           | Stack       | 0.68 $\pm$ 0.32                                                     | 0.72 $\pm$ 0.41 | 0.82 $\pm$ 0.40 | 16; 2.9; 0.237                     |
|       |               | Distance    | 0.32 $\pm$ 0.32                                                     | 0.08 $\pm$ 0.09 | 0.05 $\pm$ 0.08 | 16; 5.5; 0.065                     |
| B     | Tet           | Stack       | 0.80 $\pm$ 0.20                                                     | 0.98 $\pm$ 0.04 | 0.81 $\pm$ 0.32 | 12; 2.4; 0.307                     |

### Supplementary table 3

Females' answers to males' playback of the three familiarities. Represented are the over threshold (at least 5 calls per bird per series, at least 8 non-null values per series) tested proportions of each answer type over all the answers for each series. A numerical example illustrates best our approach: to test whether birds used differential proportions of stacks out of all the answers to respond to play-backed stacks depending on the familiarity level we did the follow: If for example a bird used 30 calls to answer the stack mate calls and 15 of these answers were stacks, its proportion of answers with stack to mate's stack was 50%; if the same bird then used 20 calls to answer the familiar stacks and 15 of these answers were stacks, its proportion of answers with stacks to familiar stacks was 75%; finally, if the same bird used 20 calls to answer the unfamiliar stacks and 18 of these answers were stacks, its proportion of answers with stacks to unfamiliar stacks was 90%. We did the same for every tested bird and then compared the proportion of the three familiarities with a non-parametric test (Kruskal-Wallis rank sum test).

| Trial | Playback type | Answer type | Proportion of the specific call type used as answer (mean $\pm$ SD) |                 |                 | Test (N; K-W chi-squared; P-value) |
|-------|---------------|-------------|---------------------------------------------------------------------|-----------------|-----------------|------------------------------------|
|       |               |             | Mate                                                                | Familiar        | Unfamiliar      |                                    |
| A     | Distance      | Tet         | 0.22 $\pm$ 0.24                                                     | 0.08 $\pm$ 0.10 | 0.03 $\pm$ 0.05 | 18; 5.3; 0.070                     |
|       |               | Stack       | 0.11 $\pm$ 0.16                                                     | 0.27 $\pm$ 0.33 | 0.25 $\pm$ 0.21 | 18; 0.9; 0.641                     |
|       |               | Distance    | 0.20 $\pm$ 0.19                                                     | 0.28 $\pm$ 0.35 | 0.27 $\pm$ 0.26 | 18; 0.04; 0.982                    |
|       |               | Whine       | 0.03 $\pm$ 0.04                                                     | 0.15 $\pm$ 0.27 | 0.17 $\pm$ 0.37 | 18; 0.04; 0.980                    |
|       |               | Hat         | 0.23 $\pm$ 0.27                                                     | 0.09 $\pm$ 0.17 | 0.13 $\pm$ 0.26 | 18; 2; 0.372                       |
| B     | Distance      | Tet         | 0.06 $\pm$ 0.10                                                     | 0.03 $\pm$ 0.04 | 0.14 $\pm$ 0.34 | 18; 0.2; 0.904                     |
|       |               | Stack       | 0.31 $\pm$ 0.26                                                     | 0.49 $\pm$ 0.44 | 0.51 $\pm$ 0.39 | 18; 1.1; 0.567                     |
|       |               | Distance    | 0.25 $\pm$ 0.21                                                     | 0.21 $\pm$ 0.33 | 0.14 $\pm$ 0.13 | 18; 1; 0.612                       |
|       |               | Whine       | 0.04 $\pm$ 0.08                                                     | 0.03 $\pm$ 0.05 | 0.03 $\pm$ 0.03 | 18; 0.4; 0.829                     |
|       |               | Hat         | 0.19 $\pm$ 0.37                                                     | 0.15 $\pm$ 0.24 | 0.03 $\pm$ 0.05 | 18; 0.5; 0.781                     |
| A     | Hat           | Stack       | 0.55 $\pm$ 0.25                                                     | 0.64 $\pm$ 0.44 | 0.07 $\pm$ 0.08 | 9; 2.2; 0.326                      |
| B     | Hat           | Stack       | 0.62 $\pm$ 0.31                                                     | 0.92 $\pm$ 0.13 | 0.75 $\pm$ 0.20 | 11; 2.7; 0.255                     |
| A     | Kackle        | Stack       | 0.36 $\pm$ 0.34                                                     | 0.67 $\pm$ 0.18 | 0.44 $\pm$ 0.30 | 9; 1.5; 0.472                      |
| B     | Kackle        | Stack       | 0.93 $\pm$ 0.06                                                     | 0.82 $\pm$ 0.23 | 0.78 $\pm$ 0.26 | 15; 0.6; 0.754                     |
|       |               | Distance    | 0.02 $\pm$ 0.02                                                     | 0.03 $\pm$ 0.06 | 0.05 $\pm$ 0.05 | 15; 0.4; 0.820                     |
| A     | Stack         | Stack       | 0.64 $\pm$ 0.14                                                     | 0.57 $\pm$ 0.41 | 0.57 $\pm$ 0.47 | 13; 0.1; 0.952                     |
|       |               | Distance    | 0.13 $\pm$ 0.16                                                     | 0.04 $\pm$ 0.07 | 0.04 $\pm$ 0.04 | 13; 1; 0.601                       |
| B     | Stack         | Stack       | 0.72 $\pm$ 0.25                                                     | 0.85 $\pm$ 0.08 | 0.69 $\pm$ 0.31 | 17; 0.4; 0.816                     |
|       |               | Distance    | 0.14 $\pm$ 0.23                                                     | 0.10 $\pm$ 0.09 | 0.05 $\pm$ 0.05 | 17; 0.8; 0.666                     |
| B     | Tet           | Stack       | 0.83 $\pm$ 0.25                                                     | 0.87 $\pm$ 0.07 | 0.81 $\pm$ 0.29 | 13; 1; 0.621                       |

#### Supplementary table 4

Males' answers to females' playback of the three familiarities. Represented are the over threshold (at least 5 calls per bird per series, at least 8 non-null values per series) tested proportions of each answer type over all the answers for each series. For further explanation and a numerical example see caption of the table S3



**a**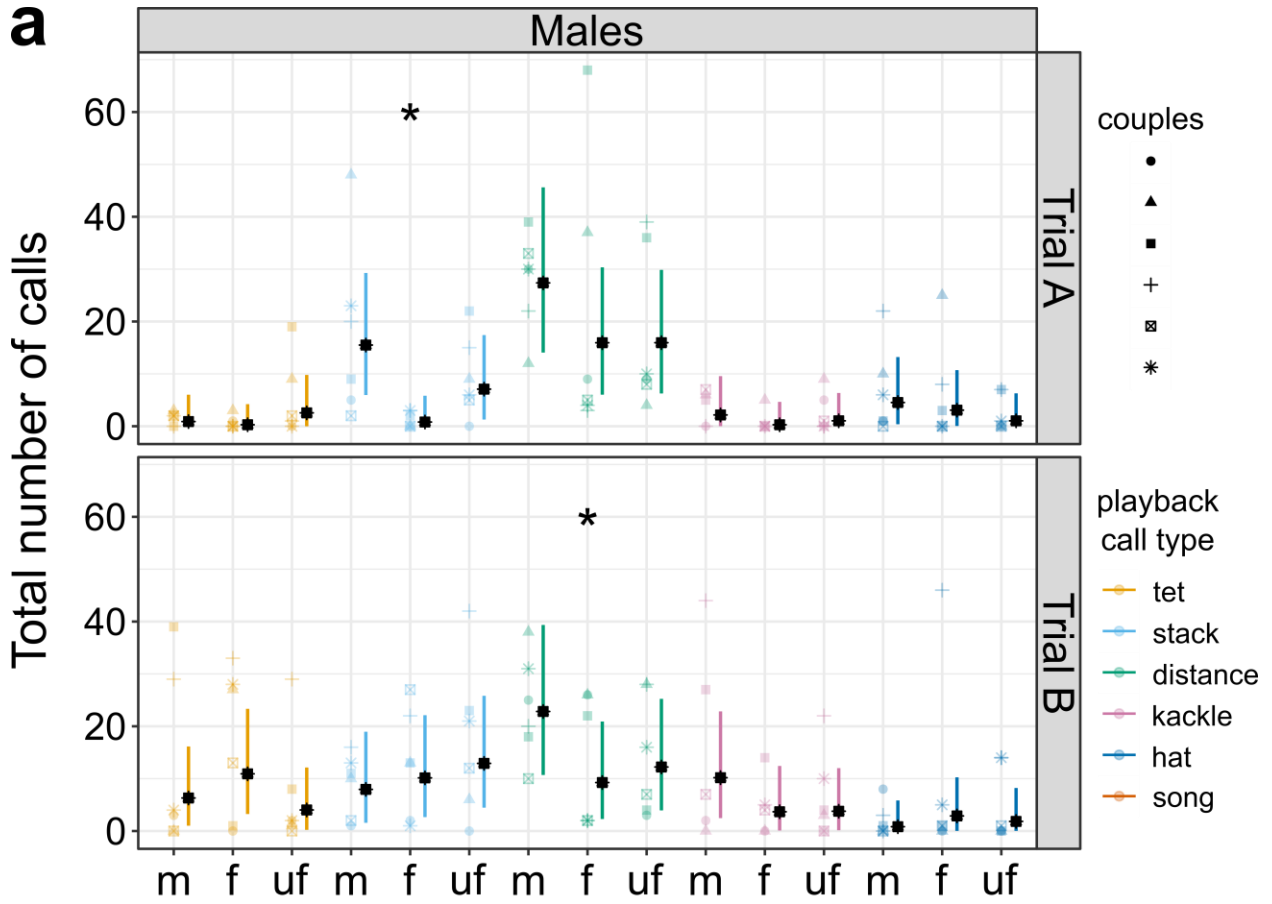**b**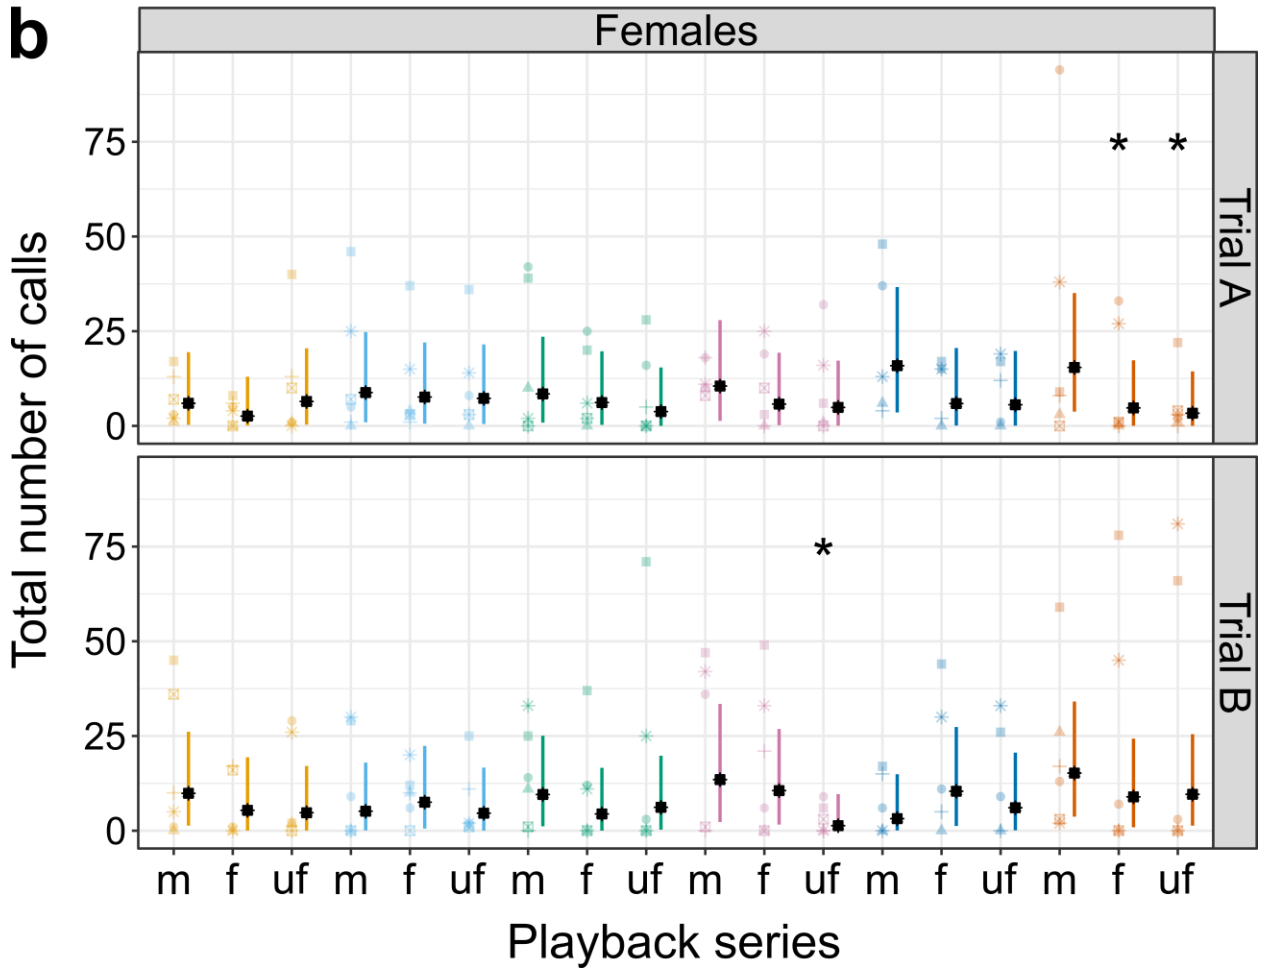

### Supplementary fig. 4

Number of answering calls that focal individuals emitted during the broadcasting of the first 30 playback stimuli of the different playback series. For males (**A**) and females (**B**) and both trials raw data (symbols indicate responses of individual birds) and the computed 95% credible intervals (error bars) as well as the fitted value (black symbols) are shown. Colours represent the type of playback call broadcast; symbols indicate responses of individual birds. Familiarity categories: **m**= mate of the focal bird; **f**= familiar individual; **uf**= unfamiliar individual; stars mark significant differences from the category "mate".

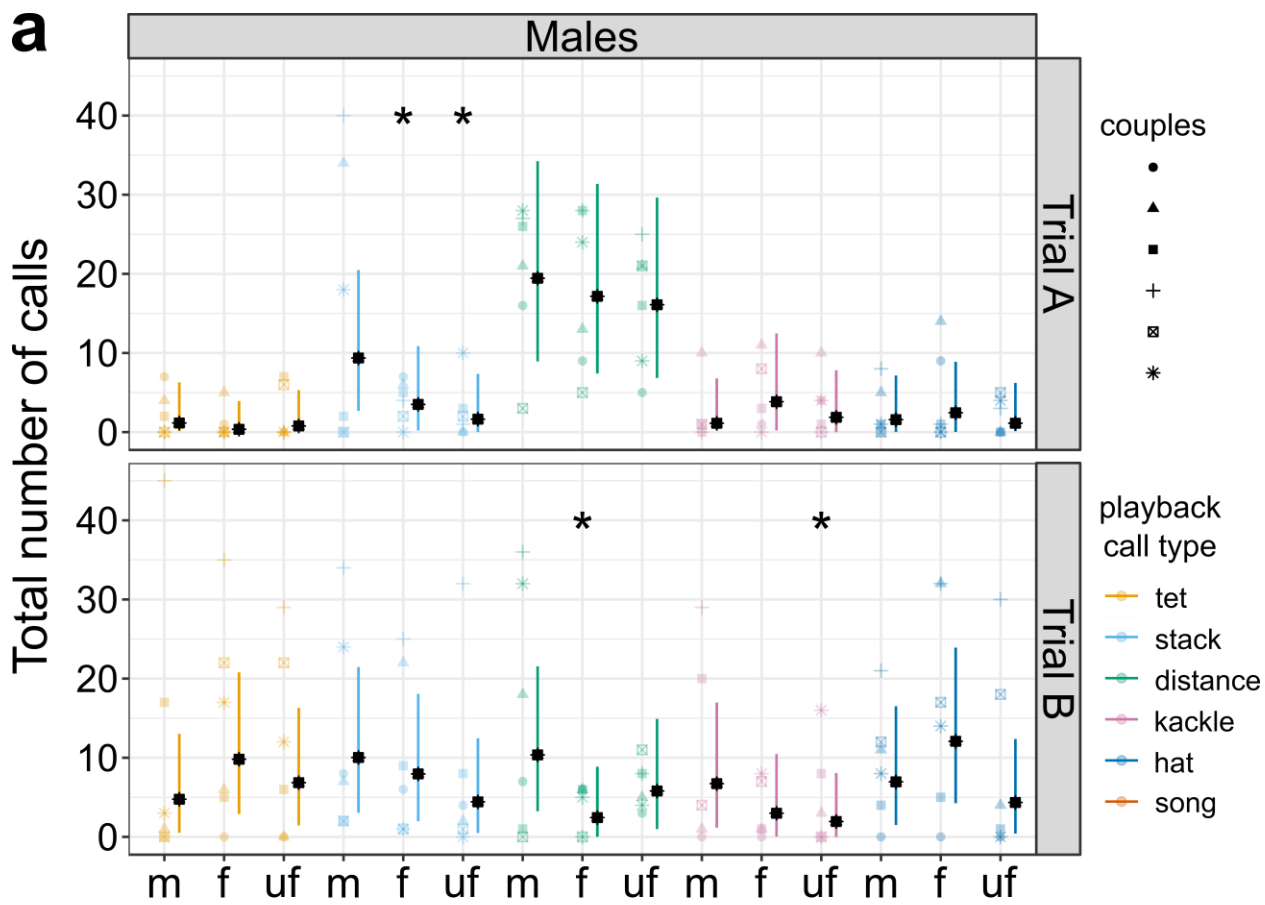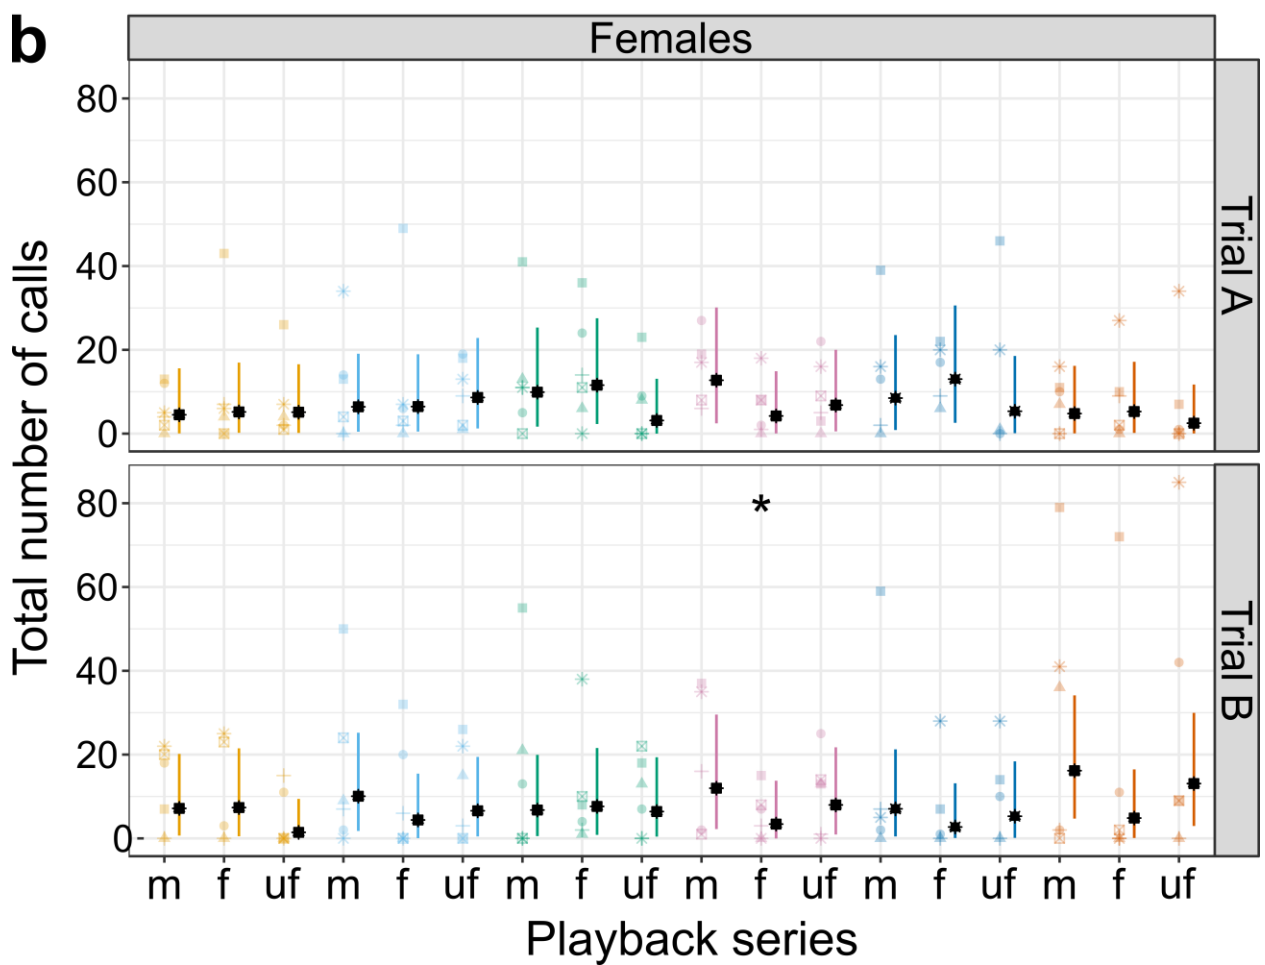

## Supplementary fig. 5

Number of answering calls that focal individuals emitted during the broadcasting of the last 30 playback stimuli of the different playback series. For males (**A**) and females (**B**) and both trials raw data (symbols indicate responses of individual birds) and the computed 95% credible intervals (error bars) as well as the fitted value (black symbols) are shown. Colours represent the type of playback call broadcast; symbols indicate responses of individual birds. Familiarity categories: **m**= mate of the focal bird; **f**= familiar individual; **uf**= unfamiliar individual; stars mark significant differences from the category "mate".

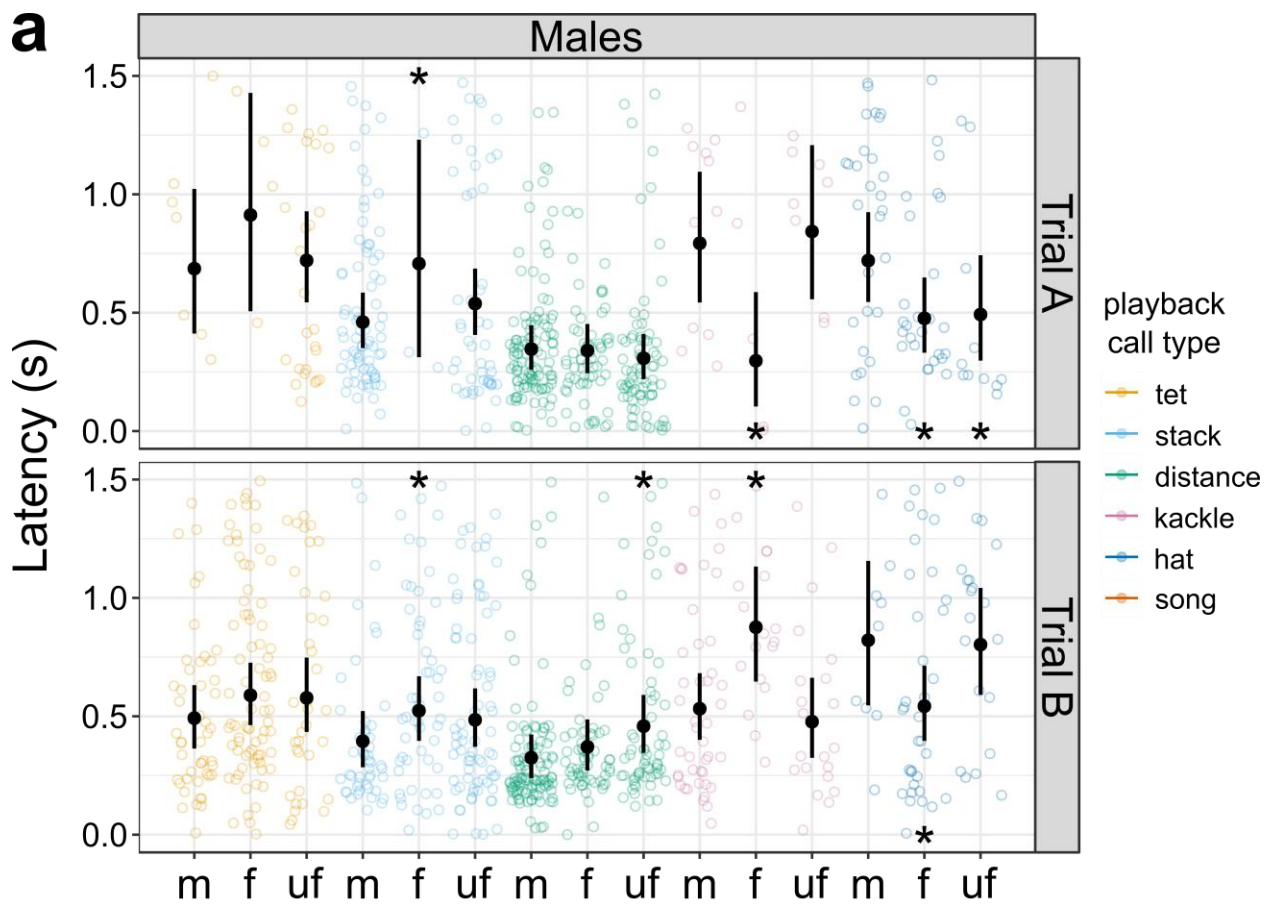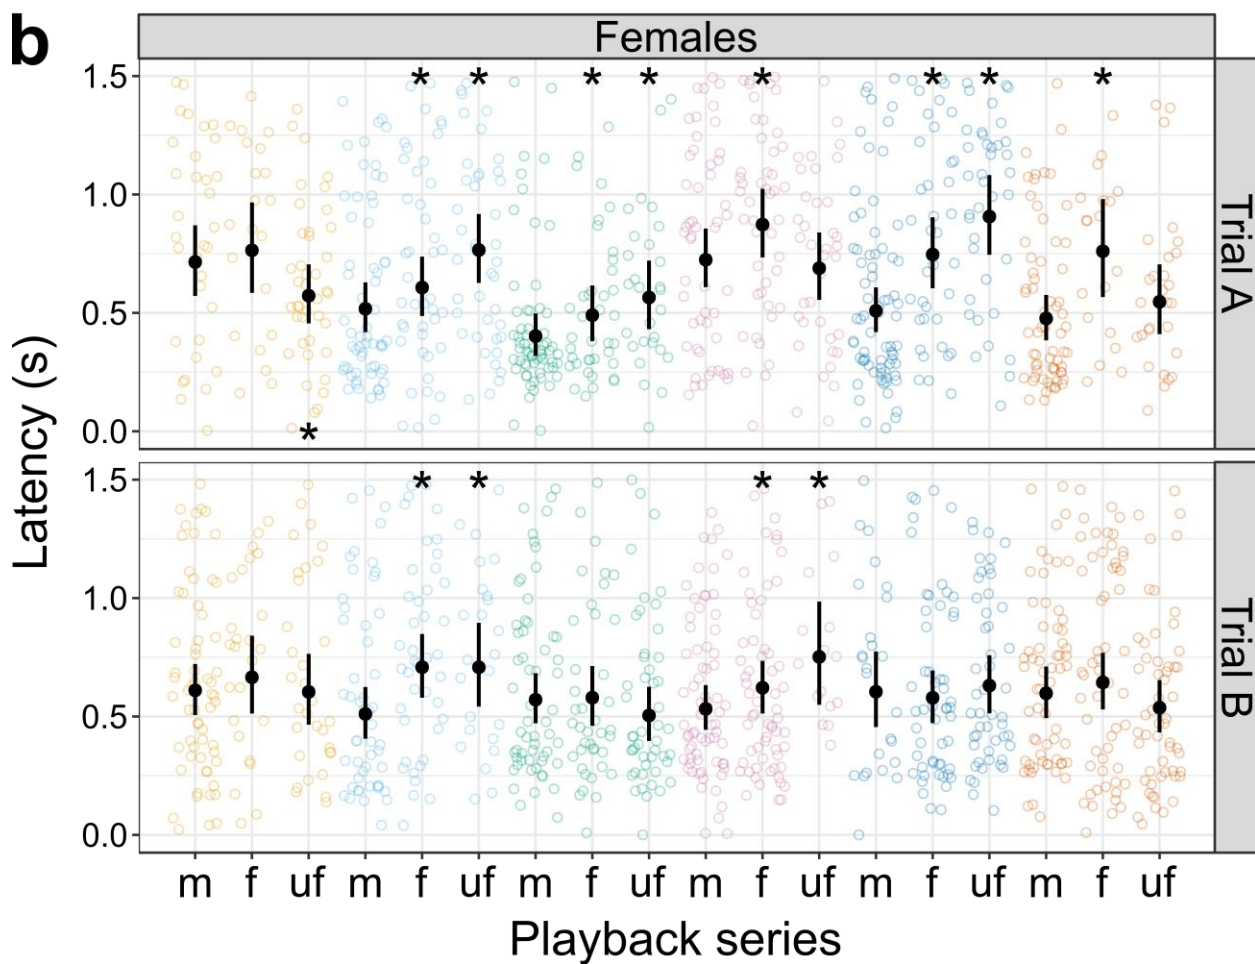

## Supplementary fig. 6

Latency to the first answering call, measured for the first 30 (playback) stimuli of the different playback series (analysed time interval: 0 - 1.5 s after the onset of the playback stimulus). Colours represent the type of playback call broadcast; dots indicate individual calls (raw data). Familiarity categories: **m**= mate of the focal bird; **f**= familiar individual; **uf**= unfamiliar individual. For males (**A**) and females (**B**) and both trials the computed 95% credible intervals (error bars) as well as the fitted value (black symbols) are shown. Stars mark significant differences from the category "mate"; stars at the bottom indicate significance in the direction opposite to the expectation (i.e. slower answers to the mate than to non-mates).

| Call type | Familiarity | Latency     |             | P mate slower |               | Qualitatively consistent with full dataset? |     |
|-----------|-------------|-------------|-------------|---------------|---------------|---------------------------------------------|-----|
|           |             | A           | B           | A             | B             | A                                           | B   |
| Tet       | Mate        | 0.80 ± 0.43 | 0.49 ± 0.33 |               |               |                                             |     |
|           | Familiar    | 1.04 ± 0.42 | 0.65 ± 0.41 | 0.0836        | 0.0862        | YES                                         | YES |
|           | Unfamiliar  | 0.67 ± 0.44 | 0.63 ± 0.44 | 0.4116        | 0.1147        | YES                                         | YES |
| Stack     | Mate        | 0.52 ± 0.34 | 0.41 ± 0.32 |               |               |                                             |     |
|           | Familiar    | 0.62 ± 0.55 | 0.61 ± 0.39 | <b>0.0001</b> | <b>0.0247</b> | NO                                          | YES |
|           | Unfamiliar  | 0.56 ± 0.46 | 0.53 ± 0.39 | 0.0954        | 0.0799        | YES                                         | NO  |
| Distance  | Mate        | 0.37 ± 0.27 | 0.33 ± 0.26 |               |               |                                             |     |
|           | Familiar    | 0.32 ± 0.20 | 0.36 ± 0.22 | 0.4982        | 0.4974        | YES                                         | YES |
|           | Unfamiliar  | 0.32 ± 0.31 | 0.49 ± 0.36 | 0.8049        | <b>0.0042</b> | YES                                         | NO  |
| Kackle    | Mate        | 0.84 ± 0.40 | 0.57 ± 0.39 |               |               |                                             |     |
|           | Familiar    | 0.53 ± 0.59 | 0.87 ± 0.32 | <b>1</b>      | <b>0</b>      | NO                                          | NO  |
|           | Unfamiliar  | 0.92 ± 0.30 | 0.51 ± 0.37 | 0.3716        | 0.7859        | YES                                         | YES |
| Hat       | Mate        | 0.83 ± 0.45 | 0.80 ± 0.39 |               |               |                                             |     |
|           | Familiar    | 0.55 ± 0.36 | 0.61 ± 0.46 | <b>0.9968</b> | <b>0.9757</b> | NO                                          | NO  |
|           | Unfamiliar  | 0.47 ± 0.43 | 0.84 ± 0.41 | <b>0.995</b>  | 0.5419        | NO                                          | YES |

### Supplementary table 5

Latency of males' calls to females' playback considering only the first 30 calls of each series. The mean ± the standard deviation of each playback series is reported together with the probability (P) value that calls emitted during mate series have a longer latency than calls emitted during the other familiarity categories. The statistical significant differences are reported in bold. The two rightmost columns indicated whether the result is different from the one obtained considering the entire playback series.

| Call type | Familiarity | Latency     |             | P mate slower |               | Qualitatively consistent with full dataset? |     |
|-----------|-------------|-------------|-------------|---------------|---------------|---------------------------------------------|-----|
|           |             | A           | B           | A             | B             | A                                           | B   |
| Tet       | Mate        | 0.81 ± 0.43 | 0.66 ± 0.40 |               |               |                                             |     |
|           | Familiar    | 0.83 ± 0.40 | 0.74 ± 0.38 | 0.2611        | 0.1715        | YES                                         | NO  |
|           | Unfamiliar  | 0.62 ± 0.33 | 0.68 ± 0.41 | <b>0.9758</b> | 0.5432        | NO                                          | NO  |
| Stack     | Mate        | 0.57 ± 0.37 | 0.59 ± 0.41 |               |               |                                             |     |
|           | Familiar    | 0.70 ± 0.42 | 0.77 ± 0.40 | <b>0.0462</b> | <b>0.0002</b> | YES                                         | YES |
|           | Unfamiliar  | 0.76 ± 0.39 | 0.75 ± 0.38 | <b>0</b>      | <b>0.0001</b> | YES                                         | YES |
| Distance  | Mate        | 0.44 ± 0.31 | 0.62 ± 0.38 |               |               |                                             |     |
|           | Familiar    | 0.52 ± 0.30 | 0.58 ± 0.37 | <b>0.0271</b> | 0.8984        | YES                                         | NO  |
|           | Unfamiliar  | 0.60 ± 0.33 | 0.55 ± 0.36 | <b>0.0001</b> | 0.431         | YES                                         | YES |
| Kackle    | Mate        | 0.77 ± 0.42 | 0.58 ± 0.33 |               |               |                                             |     |
|           | Familiar    | 0.91 ± 0.39 | 0.61 ± 0.36 | <b>0.0107</b> | <b>0.0394</b> | NO                                          | YES |
|           | Unfamiliar  | 0.72 ± 0.37 | 0.79 ± 0.33 | 0.7197        | <b>0</b>      | YES                                         | YES |
| Hat       | Mate        | 0.56 ± 0.38 | 0.67 ± 0.40 |               |               |                                             |     |
|           | Familiar    | 0.82 ± 0.42 | 0.62 ± 0.38 | <b>0</b>      | 0.6271        | YES                                         | YES |
|           | Unfamiliar  | 0.95 ± 0.39 | 0.65 ± 0.35 | <b>0</b>      | 0.3757        | YES                                         | NO  |
| Song      | Mate        | 0.52 ± 0.33 | 0.65 ± 0.35 |               |               |                                             |     |
|           | Familiar    | 0.74 ± 0.34 | 0.71 ± 0.44 | <b>0</b>      | 0.2027        | YES                                         | YES |
|           | Unfamiliar  | 0.59 ± 0.34 | 0.55 ± 0.36 | 0.0775        | 0.8752        | NO                                          | YES |

### Supplementary table 6

Latency of females' calls to males' playback considering only the first 30 calls of each series. The mean ± the standard deviation of each playback series is reported together with the probability (P) value that calls emitted during mate series have a longer latency than calls emitted during the other familiarity categories. The statistical significant differences are reported in bold. The two rightmost columns indicated whether the result is different from the one obtained considering the entire playback series.



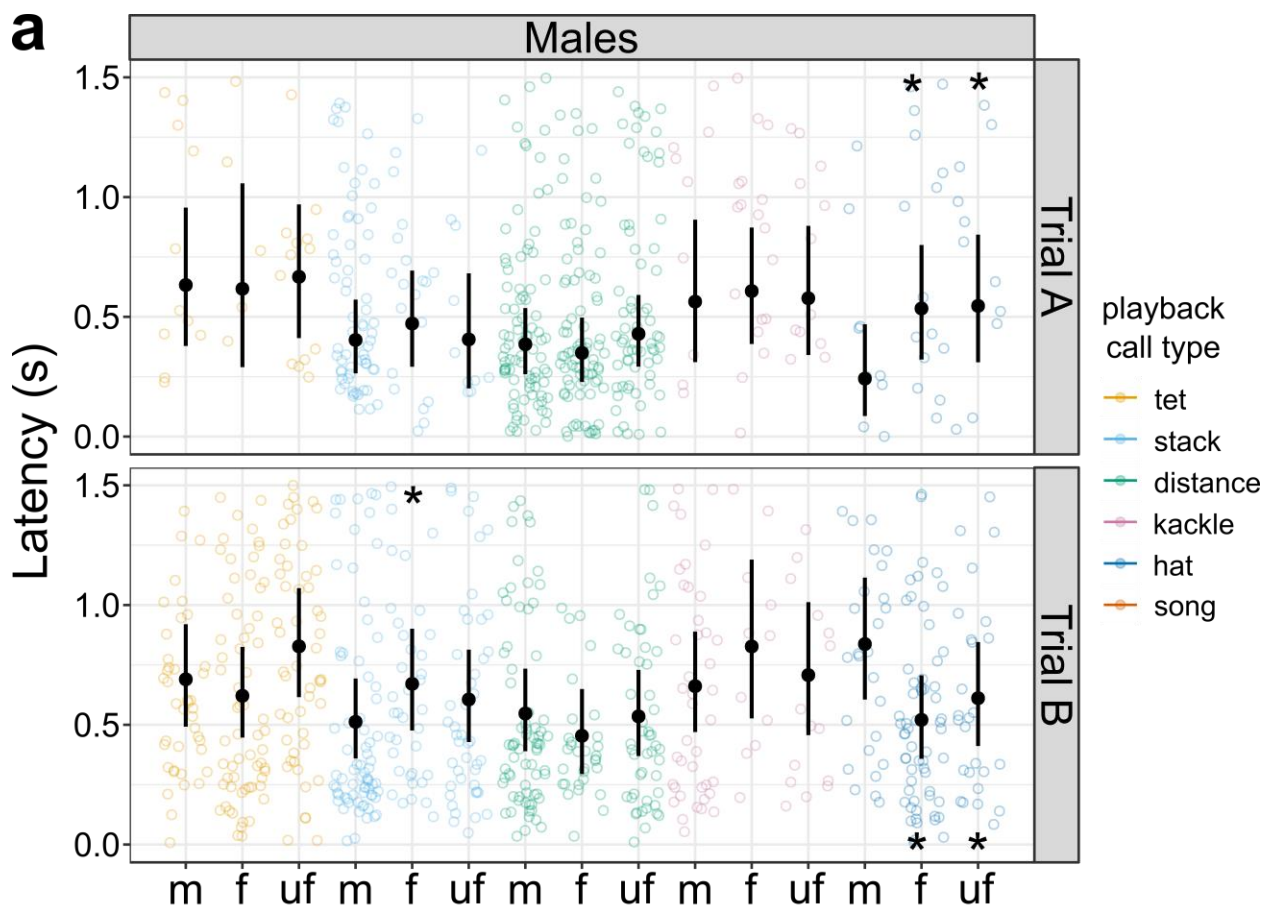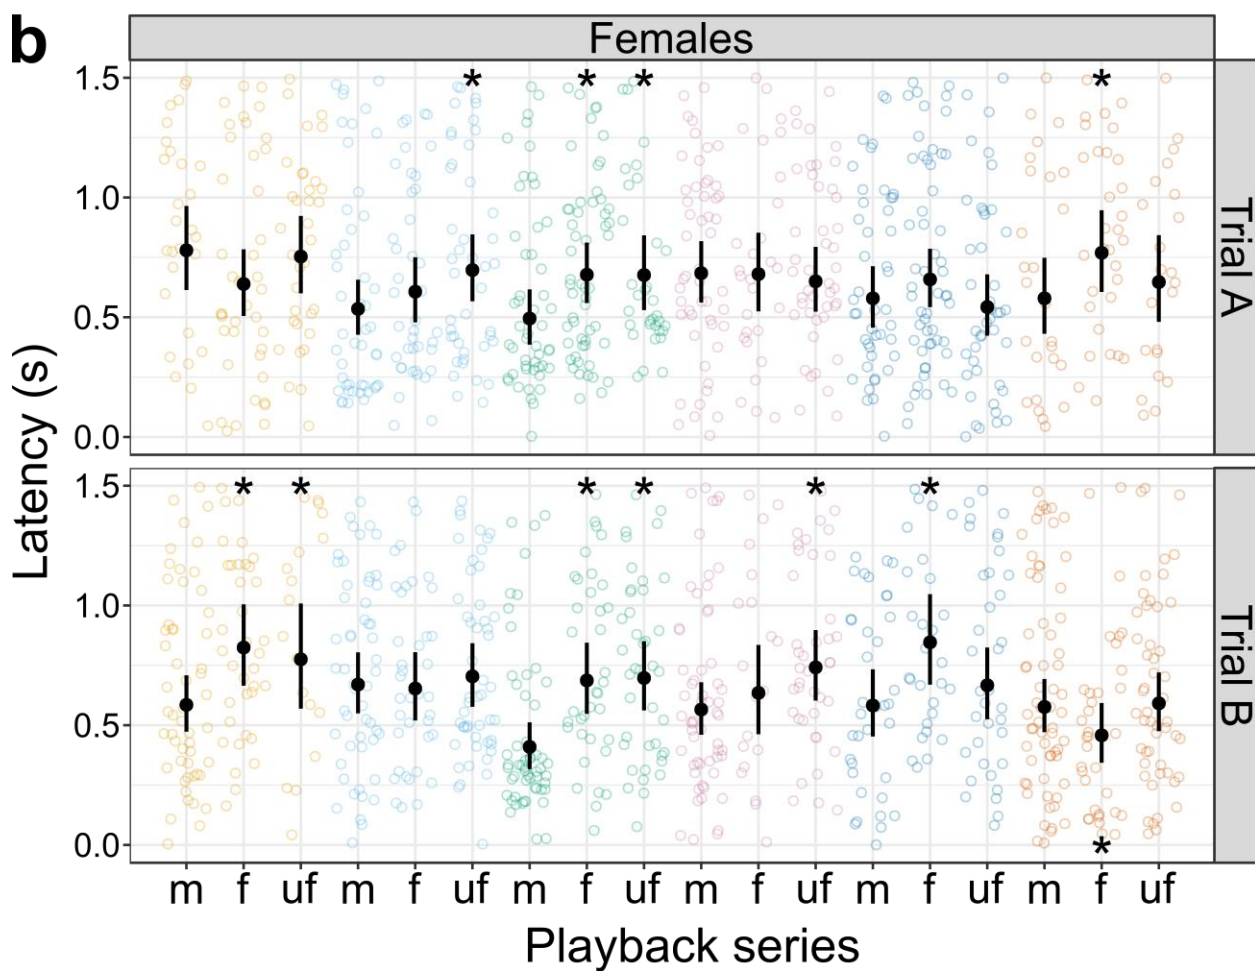

## Supplementary fig. 7

Latency to the first answering call, measured for the last 30 (playback) stimuli of the different playback series (analysed time interval: 0 - 1.5 s after the onset of the playback stimulus). Colours represent the type of playback call broadcast; dots indicate individual calls (raw data). Familiarity categories: **m**= mate of the focal bird; **f**= familiar individual; **uf**= unfamiliar individual. For males (**A**) and females (**B**) and both trials the computed 95% credible intervals (error bars) as well as the fitted value (black symbols) are shown. Stars mark significant differences from the category "mate", stars at the bottom indicate significance in the direction opposite to the expectation (i.e. slower answers to the mate than to non-mates).

| Call type | Familiarity | Latency     |             | P mate slower |               | Qualitatively consistent with full dataset? |     |
|-----------|-------------|-------------|-------------|---------------|---------------|---------------------------------------------|-----|
|           |             | A           | B           | A             | B             | A                                           | B   |
| Tet       | Mate        | 0.77 ± 0.47 | 0.61 ± 0.32 |               |               |                                             |     |
|           | Familiar    | 0.87 ± 0.45 | 0.60 ± 0.42 | 0.5469        | 0.7434        | YES                                         | YES |
|           | Unfamiliar  | 0.66 ± 0.34 | 0.80 ± 0.42 | 0.4131        | 0.1148        | YES                                         | YES |
| Stack     | Mate        | 0.56 ± 0.37 | 0.50 ± 0.42 |               |               |                                             |     |
|           | Familiar    | 0.58 ± 0.36 | 0.63 ± 0.37 | 0.2021        | <b>0.0414</b> | YES                                         | YES |
|           | Unfamiliar  | 0.50 ± 0.37 | 0.59 ± 0.42 | 0.4894        | 0.1476        | YES                                         | NO  |
| Distance  | Mate        | 0.47 ± 0.36 | 0.52 ± 0.38 |               |               |                                             |     |
|           | Familiar    | 0.44 ± 0.34 | 0.42 ± 0.24 | 0.5022        | 0.506         | YES                                         | YES |
|           | Unfamiliar  | 0.56 ± 0.41 | 0.54 ± 0.38 | 0.2751        | 0.5683        | YES                                         | YES |
| Kackle    | Mate        | 0.85 ± 0.49 | 0.63 ± 0.44 |               |               |                                             |     |
|           | Familiar    | 0.80 ± 0.40 | 0.81 ± 0.42 | 0.3835        | 0.0706        | YES                                         | YES |
|           | Unfamiliar  | 0.75 ± 0.38 | 0.62 ± 0.40 | 0.4619        | 0.3243        | YES                                         | YES |
| Hat       | Mate        | 0.43 ± 0.41 | 0.77 ± 0.39 |               |               |                                             |     |
|           | Familiar    | 0.75 ± 0.51 | 0.52 ± 0.37 | <b>0.0076</b> | <b>0.9977</b> | NO                                          | NO  |
|           | Unfamiliar  | 0.75 ± 0.45 | 0.60 ± 0.40 | <b>0.0063</b> | <b>0.9721</b> | NO                                          | NO  |

### Supplementary table 7

Latency of males' calls to females' playback considering only the last 30 calls of each series. The mean ± the standard deviation of each playback series is reported together with the probability (P) value that calls emitted during mate series have a longer latency than calls emitted during the other familiarity categories. The statistical significant differences are reported in bold. The two rightmost columns indicated whether the result is different from the one obtained considering the entire playback series.

| Call type | Familiarity | Latency     |             | P mate slower |               | Qualitatively consistent with full dataset? |     |
|-----------|-------------|-------------|-------------|---------------|---------------|---------------------------------------------|-----|
|           |             | A           | B           | A             | B             | A                                           | B   |
| Tet       | Mate        | 0.85 ± 0.42 | 0.67 ± 0.40 |               |               |                                             |     |
|           | Familiar    | 0.70 ± 0.46 | 0.83 ± 0.38 | 0.9476        | <b>0.0001</b> | YES                                         | YES |
|           | Unfamiliar  | 0.80 ± 0.38 | 0.68 ± 0.37 | 0.6155        | <b>0.0021</b> | YES                                         | YES |
| Stack     | Mate        | 0.60 ± 0.45 | 0.72 ± 0.39 |               |               |                                             |     |
|           | Familiar    | 0.64 ± 0.40 | 0.69 ± 0.36 | 0.1143        | 0.6098        | NO                                          | NO  |
|           | Unfamiliar  | 0.74 ± 0.42 | 0.73 ± 0.37 | <b>0.0054</b> | 0.2941        | YES                                         | NO  |
| Distance  | Mate        | 0.58 ± 0.39 | 0.45 ± 0.34 |               |               |                                             |     |
|           | Familiar    | 0.71 ± 0.37 | 0.73 ± 0.38 | <b>0.0021</b> | <b>0</b>      | YES                                         | YES |
|           | Unfamiliar  | 0.69 ± 0.36 | 0.74 ± 0.38 | <b>0.0023</b> | <b>0</b>      | YES                                         | NO  |
| Kackle    | Mate        | 0.73 ± 0.40 | 0.62 ± 0.39 |               |               |                                             |     |
|           | Familiar    | 0.72 ± 0.41 | 0.73 ± 0.45 | 0.5208        | 0.1153        | YES                                         | NO  |
|           | Unfamiliar  | 0.73 ± 0.35 | 0.79 ± 0.37 | 0.6942        | <b>0.0021</b> | YES                                         | YES |
| Hat       | Mate        | 0.65 ± 0.37 | 0.61 ± 0.38 |               |               |                                             |     |
|           | Familiar    | 0.72 ± 0.42 | 0.83 ± 0.36 | 0.1217        | <b>0.0004</b> | NO                                          | NO  |
|           | Unfamiliar  | 0.57 ± 0.41 | 0.75 ± 0.43 | 0.7051        | 0.1229        | NO                                          | NO  |
| Song      | Mate        | 0.66 ± 0.46 | 0.66 ± 0.43 |               |               |                                             |     |
|           | Familiar    | 0.84 ± 0.39 | 0.49 ± 0.38 | <b>0.0138</b> | <b>0.9869</b> | YES                                         | NO  |
|           | Unfamiliar  | 0.68 ± 0.41 | 0.63 ± 0.37 | 0.2061        | 0.3962        | NO                                          | YES |

### Supplementary table 8

Latency of females' calls to males' playback considering only the last 30 calls of each series. The mean ± the standard deviation of each playback series is reported together with the probability (P) value that calls emitted during mate series have a longer latency than calls emitted during the other familiarity categories. The statistical significant differences are reported in bold. The two rightmost columns indicated whether the result is different from the one obtained considering the entire playback series.

| call_comb.  | ans_m | awd_m | ans_f | awd_f | day | ans_m_p | awd_m_p | ans_f_p | awd_f_p | cp |
|-------------|-------|-------|-------|-------|-----|---------|---------|---------|---------|----|
| stack_stack | 148   | 125   | 124   | 152   | d1  | 38.54   | 32.55   | 21.12   | 25.89   | 1  |
| stack_stack | 175   | 174   | 184   | 177   | d3  | 33.27   | 33.08   | 21.47   | 20.65   | 1  |
| stack_stack | 208   | 243   | 243   | 203   | d1  | 15.77   | 18.42   | 19.35   | 16.16   | 2  |
| stack_stack | 296   | 267   | 262   | 293   | d3  | 15.23   | 13.74   | 16.21   | 18.13   | 2  |
| stack_stack | 1196  | 1346  | 1173  | 1045  | d1  | 32.88   | 36.99   | 20.94   | 18.65   | 5  |
| stack_stack | 1041  | 1302  | 1274  | 1009  | d3  | 29.77   | 37.23   | 23.20   | 18.38   | 5  |
| stack_stack | 70    | 84    | 86    | 75    | d1  | 7.88    | 9.46    | 7.21    | 6.29    | 8  |
| stack_stack | 193   | 224   | 227   | 188   | d3  | 4.06    | 4.71    | 16.62   | 13.76   | 8  |
| stack_stack | 79    | 87    | 91    | 81    | d1  | 15.52   | 17.09   | 2.03    | 1.80    | 9  |
| stack_stack | 169   | 196   | 198   | 180   | d3  | 22.84   | 26.49   | 4.06    | 3.69    | 9  |
| stack_stack | 64    | 127   | 120   | 60    | d1  | 10.261  | 20.35   | 5.60    | 2.80    | 11 |
| stack_stack | 333   | 462   | 450   | 323   | d3  | 12.97   | 17.99   | 6.60    | 4.75    | 11 |

### Supplementary table 9

Stack-stack call interactions in all six focal pairs during the baseline (days 1 and 3). Absolute and relative numbers of answered stack calls and stack calls used as answers by males and females (ans\_m, ans\_f: number of stack calls that were used by male or female, respectively, to answer a partner's stack call; awd\_m, awd\_f: number of male or female stack calls, respectively, that were answered by a stack call of the partner; ans\_m\_p, ans\_f\_p: percentaged number of stack calls that were used by male or female, respectively, to answer a partner's stack call; awd\_m\_p, awd\_f\_p: percentage number of male or female stack calls, respectively, that were answered by a stack call of the partner; cp: couple ID).

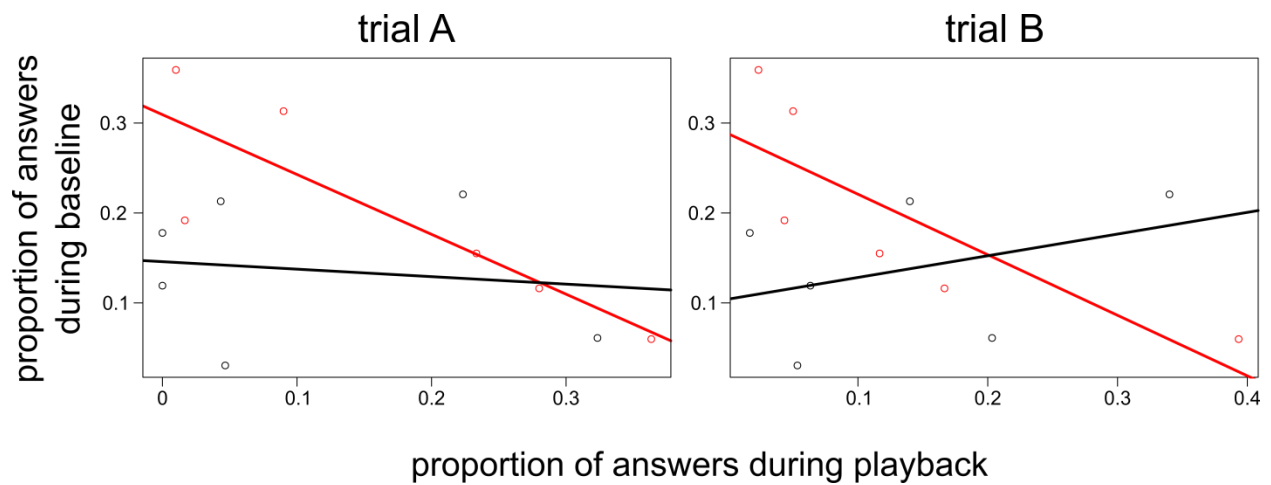

| <b>Tria A, MALES, Baseline~playback experiment</b>   |                 |                       |                |
|------------------------------------------------------|-----------------|-----------------------|----------------|
|                                                      | <b>Estimate</b> | <b>Standard Error</b> | <b>P-value</b> |
| Intercept                                            | 3.09            | 0.44                  |                |
| playback experiment                                  | -6.66           | 2.07                  | <b>0.0324</b>  |
| <b>Tria B, MALES, Baseline~playback experiment</b>   |                 |                       |                |
| Intercept                                            | 2.88            | 0.45                  |                |
| playback experiment                                  | -6.73           | 2.46                  | 0.0523         |
| <b>Tria A, FEMALES, Baseline~playback experiment</b> |                 |                       |                |
| Intercept                                            | 1.45            | 0.47                  |                |
| playback experiment                                  | -0.83           | 2.93                  | 0.7905         |
| <b>Tria B, FEMALES, Baseline~playback experiment</b> |                 |                       |                |
| Intercept                                            | 1.04            | 0.54                  |                |
| playback experiment                                  | 2.41            | 3.09                  | 0.4784         |

### Supplementary fig. 8

Relationship between the proportion of stack-stack answers given during baseline (mean of both days) and those during trials A and B of the playback experiment. Dots represent individual birds, lines the regression line of the linear model between the 2 variables, whose results are reported in the table together with the correspondent P-value. The males are depicted in red and the females in black.

**a**

| Sex      | Call     | Mean  | SD    |
|----------|----------|-------|-------|
| <b>m</b> | Distance | 1.9%  | 4.5%  |
| <b>m</b> | Hat      | 0     | 0     |
| <b>m</b> | Kackle   | 20%   | 9.3%  |
| <b>m</b> | Song     | 5.6%  | 6.1%  |
| <b>m</b> | Tet      | 7.4%  | 9.1%  |
| <b>m</b> | Stack    | 7.4%  | 13.5% |
| <b>f</b> | Distance | 20.4% | 14.8% |
| <b>f</b> | Hat      | 1.9%  | 4.5%  |
| <b>f</b> | Kackle   | 13.9% | 5.6%  |
| <b>f</b> | Tet      | 3.2%  | 5.4%  |
| <b>f</b> | Stack    | 7.4%  | 9.1%  |

**b**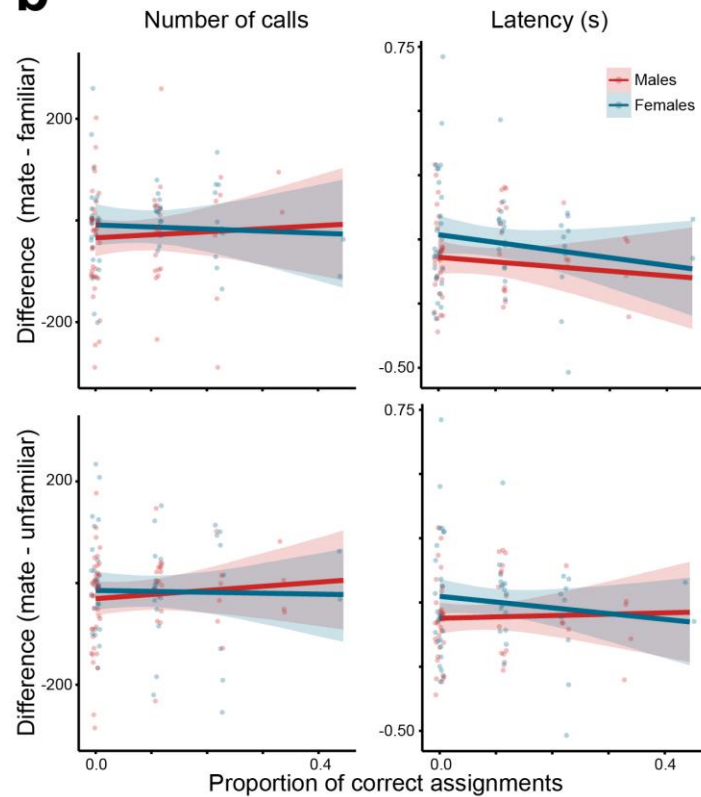

### Supplementary fig. 9

Relation between the variability in the call type (e.g., stack call) to the variation in conspecific response. (a) Values of incorrect assignment of the linear discriminant analysis. For each call type the percentage of incorrectly assigned calls are reported (mean value and the standard deviation, n=6 individuals per sex). Higher values correspond to more similar calls (i.e. call types more difficult to assign to the correct individual). (b) Results of linear mixed model (shaded areas) with row data (dots) correlating the within call type variability as a predictor of the conspecific response (number of calls left panel and latency in the right panels). Top panels contain the differences between mate and familiar and the bottom panels between mate and unfamiliar. Male calls are depicted in red and females in blues.
